# Supplementary material for: A Randomised Crossover Trial: Exploring the Dose-Response effect Of Carbohydrate restriction on glycaemia in people with type 2 diabetes (D-ROC2)
Source: bioRxiv or medRxiv preprint supplement (doi:10.1101/2021.05.30.21258049), 2021-06-01

**Enrollment**

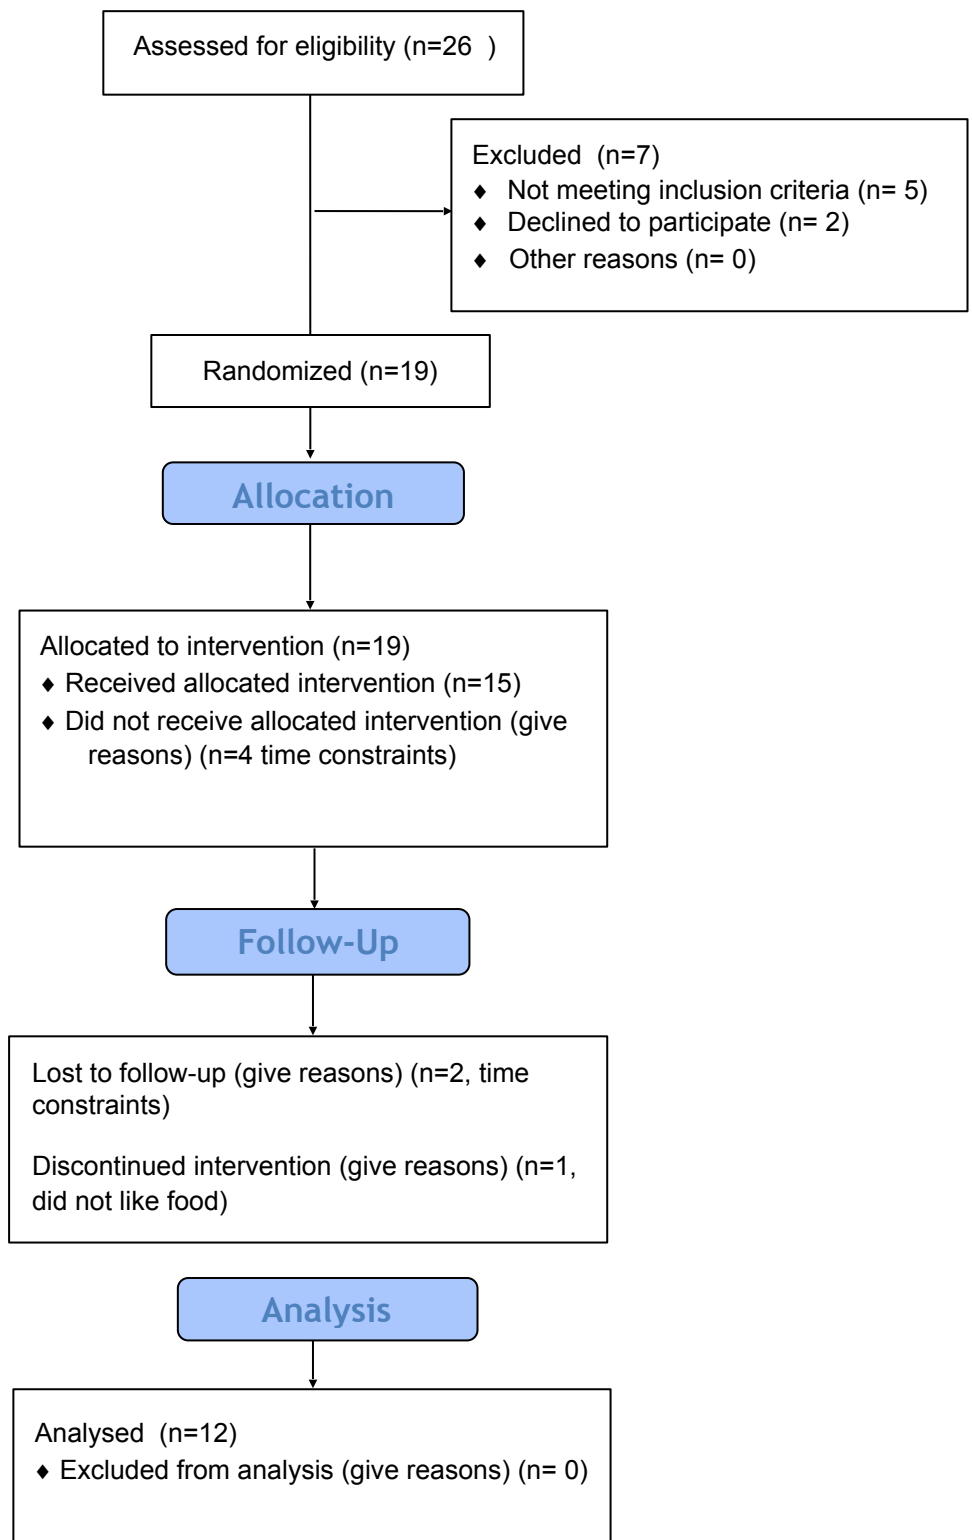

Figure S1: CONSORT flow diagram of study

|           |                 | <b>Dose of carbohydrate</b> |            |            |            |            |
|-----------|-----------------|-----------------------------|------------|------------|------------|------------|
|           |                 | <b>10%</b>                  | <b>15%</b> | <b>20%</b> | <b>25%</b> | <b>30%</b> |
|           |                 | <b>g</b>                    | <b>g</b>   | <b>g</b>   | <b>g</b>   | <b>g</b>   |
| Breakfast | Bagels          | 20                          | 35         | 50         | 60         | 80         |
|           | Butter          | 22                          | 24         | 18         | 15         | 15         |
|           | Keto Pancake    | 125                         | 120        | 105        | 100        | 90         |
|           | Walnuts         | 25                          | 20         | 25         | 25         | 20         |
| Lunch     | White fish      | 80                          | 80         | 80         | 70         | 60         |
|           | Rice            | 35                          | 65         | 100        | 130        | 150        |
|           | Cauliflower     | 60                          | 60         | 60         | 60         | 60         |
|           | Sunflower oil   | 22                          | 22         | 22         | 22         | 17         |
|           | Lettuce         | 35                          | 35         | 35         | 35         | 35         |
|           | Cucumber        | 50                          | 50         | 50         | 50         | 50         |
|           | Tomatoes        | 50                          | 50         | 50         | 50         | 50         |
|           | Feta cheese     | 60                          | 60         | 54         | 55         | 60         |
|           | Olive oil       | 25                          | 20         | 19         | 15         | 15         |
| Dinner    | Chicken breast  | 60                          | 60         | 55         | 50         | 50         |
|           | Croutons        | 20                          | 30         | 40         | 50         | 60         |
|           | Avocado         | 130                         | 120        | 110        | 100        | 70         |
|           | Parmesan cheese | 15                          | 15         | 12         | 15         | 15         |
|           | Lettuce         | 30                          | 30         | 30         | 30         | 30         |
|           | Olives          | 18                          | 18         | 18         | 18         | 18         |
|           | Olive oil       | 25                          | 22         | 20         | 17         | 15         |
|           | Dates           | 10                          | 15         | 20         | 25         | 40         |
| Snack     | Greek yoghurt   | 120                         | 160        | 140        | 150        | 150        |
|           | Cream           | 10                          | 10         | 5          | 0          | 0          |
|           | Raspberries     | 10                          | 25         | 30         | 35         | 40         |

|  |                |    |    |    |    |     |
|--|----------------|----|----|----|----|-----|
|  | Mango          | 0  | 30 | 50 | 90 | 115 |
|  | Pistachio nuts | 25 | 10 | 17 | 15 | 12  |

Table S1: Example of how the menu is altered with each dose.

|                       | <b>Mean 24-hour</b>  | <b>Post-prandial</b> | <b>CONGA</b>      | <b>MAGE</b>        | <b>log(LBGI)</b>    | <b>HBGI</b>        |
|-----------------------|----------------------|----------------------|-------------------|--------------------|---------------------|--------------------|
| Constant              | 16.949***<br>(3.809) | 18.217***<br>(4.603) | 4.294*<br>(1.952) | 11.285*<br>(5.215) | -12.029*<br>(5.366) | 19.721*<br>(7.579) |
| Dose                  | 0.017<br>(0.009)     | 0.021<br>(0.011)     | 0.007<br>(0.008)  | 0.014<br>(0.019)   | -0.024<br>(0.029)   | 0.032<br>(0.022)   |
| Age                   | -0.166*<br>(0.069)   | -0.173<br>(0.083)    | -0.047<br>(0.035) | -0.128<br>(0.094)  | 0.179<br>(0.095)    | -0.310<br>(0.136)  |
| Male                  | -2.205*<br>(0.719)   | -2.717*<br>(0.869)   | -0.662<br>(0.364) | -1.836<br>(0.976)  | 3.007*<br>(0.988)   | -3.514*<br>(1.426) |
| Kuwati                | 0.963<br>(0.715)     | 0.674<br>(0.864)     | -0.072<br>(0.365) | -0.263<br>(0.977)  | -1.967<br>(1.000)   | 2.447<br>(1.421)   |
| Weight change (kg)    | 0.076<br>(0.098)     | 0.118<br>(0.120)     |                   | 0.474*<br>(0.195)  | 0.219<br>(0.295)    | 0.326<br>(0.233)   |
| Mean steps per day    | -0.049<br>(0.044)    | (0.054)              | 0.007<br>(0.033)  | 0.024<br>(0.082)   | -0.033<br>(0.109)   | -0.023<br>(0.102)  |
| % Variance explained† | 70%                  | 69%                  | 42%               | 49%                | 22%                 | 60%                |

Table S3: Parameter estimates with standard errors from the linear mixed-effects models (\*p<0.05; \*\*p<0.01; \*\*\*p<0.001)

†Random effect for intercept explains xx% of the variance that remains after the variance has been explained by the fixed effects.

Supplementary data: Figure S2: Post-prandial glucose excursions for each participant per meal, per day.

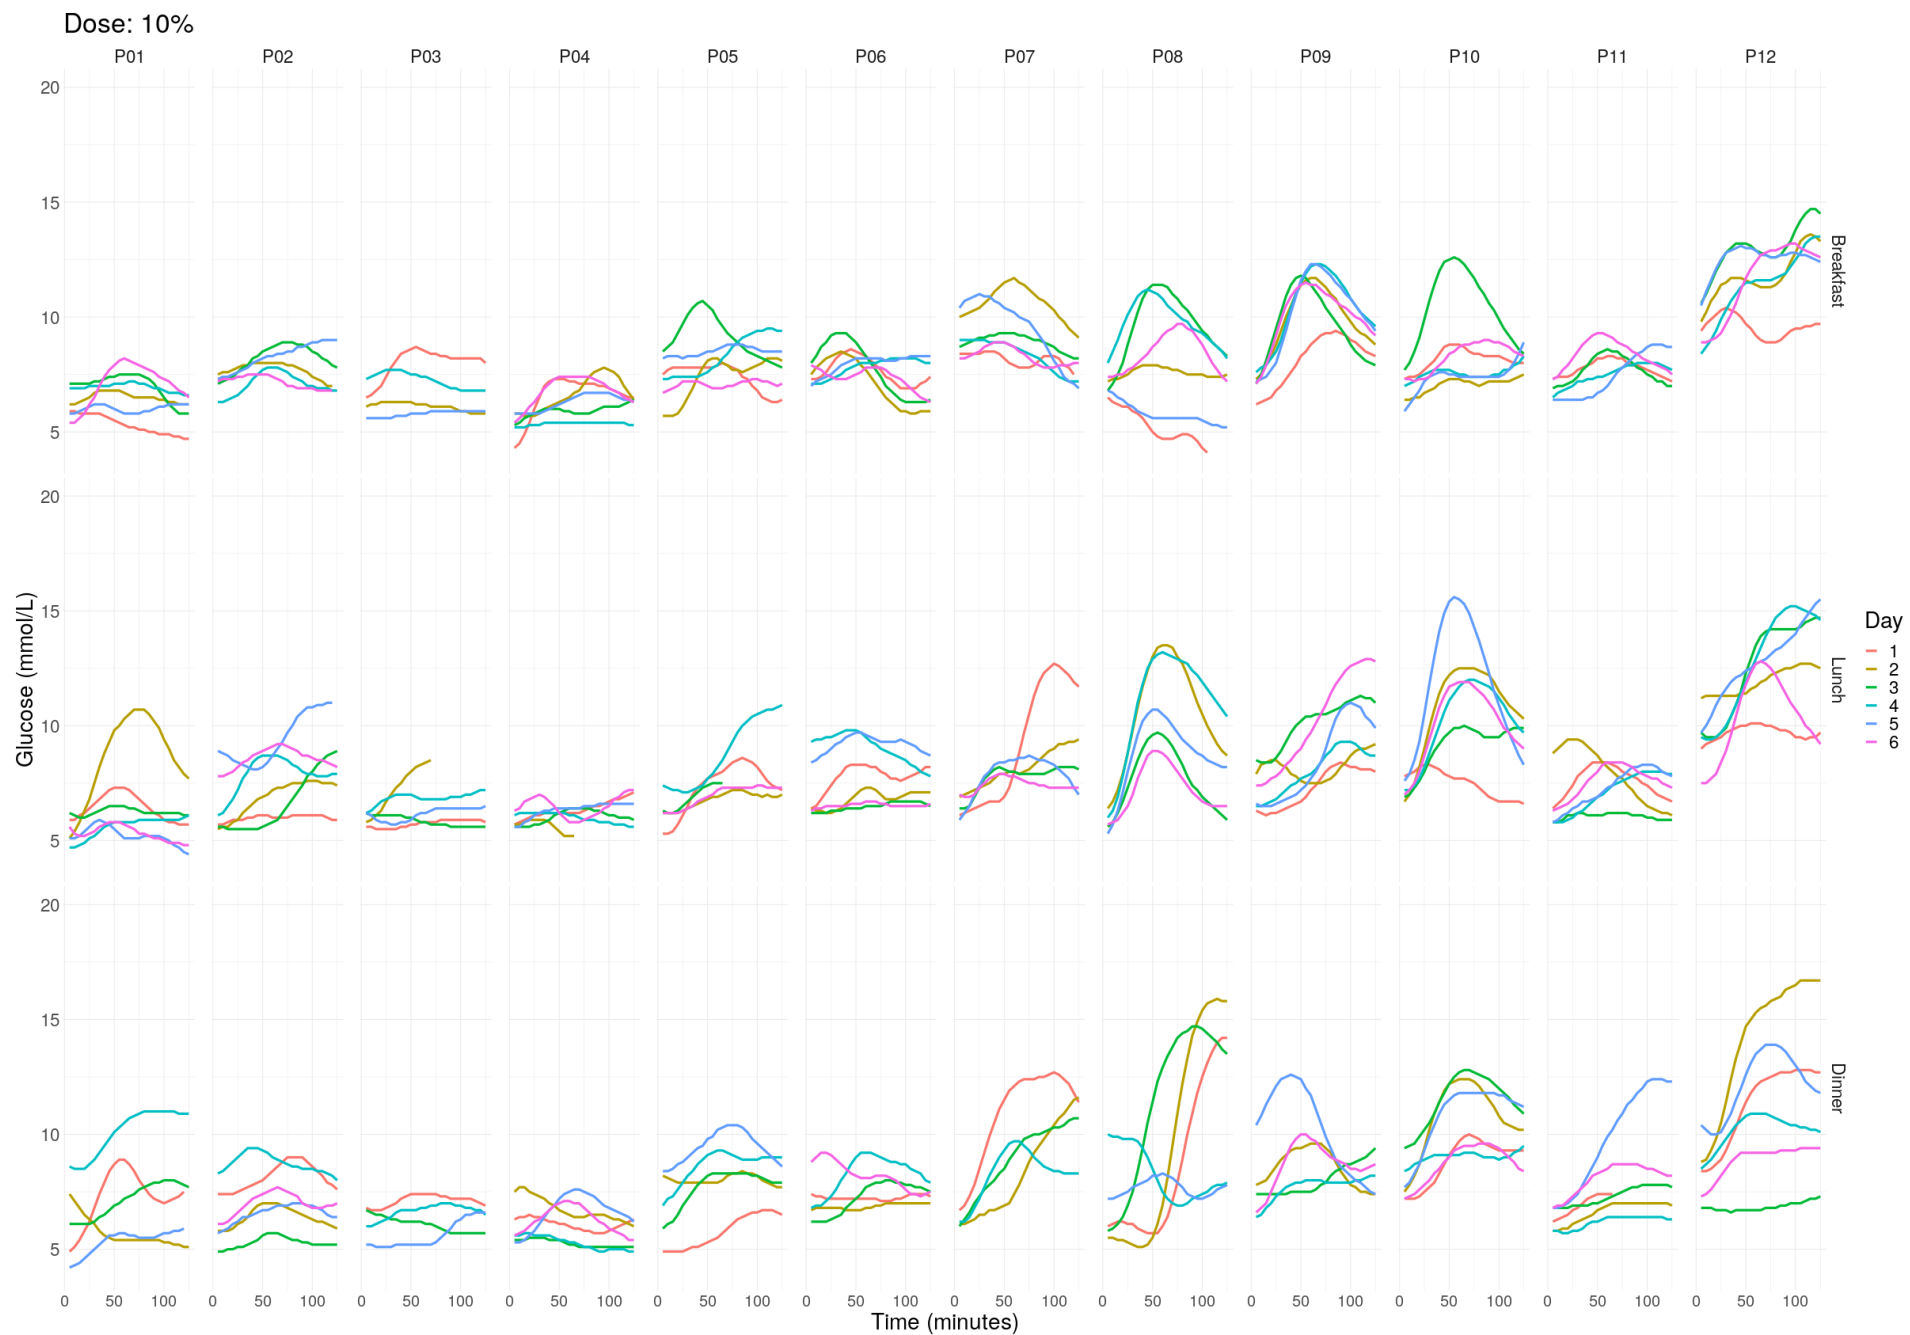

# Supplementary data: Figure S2: Post-prandial glucose excursions for each participant per meal, per day.

Dose: 15%

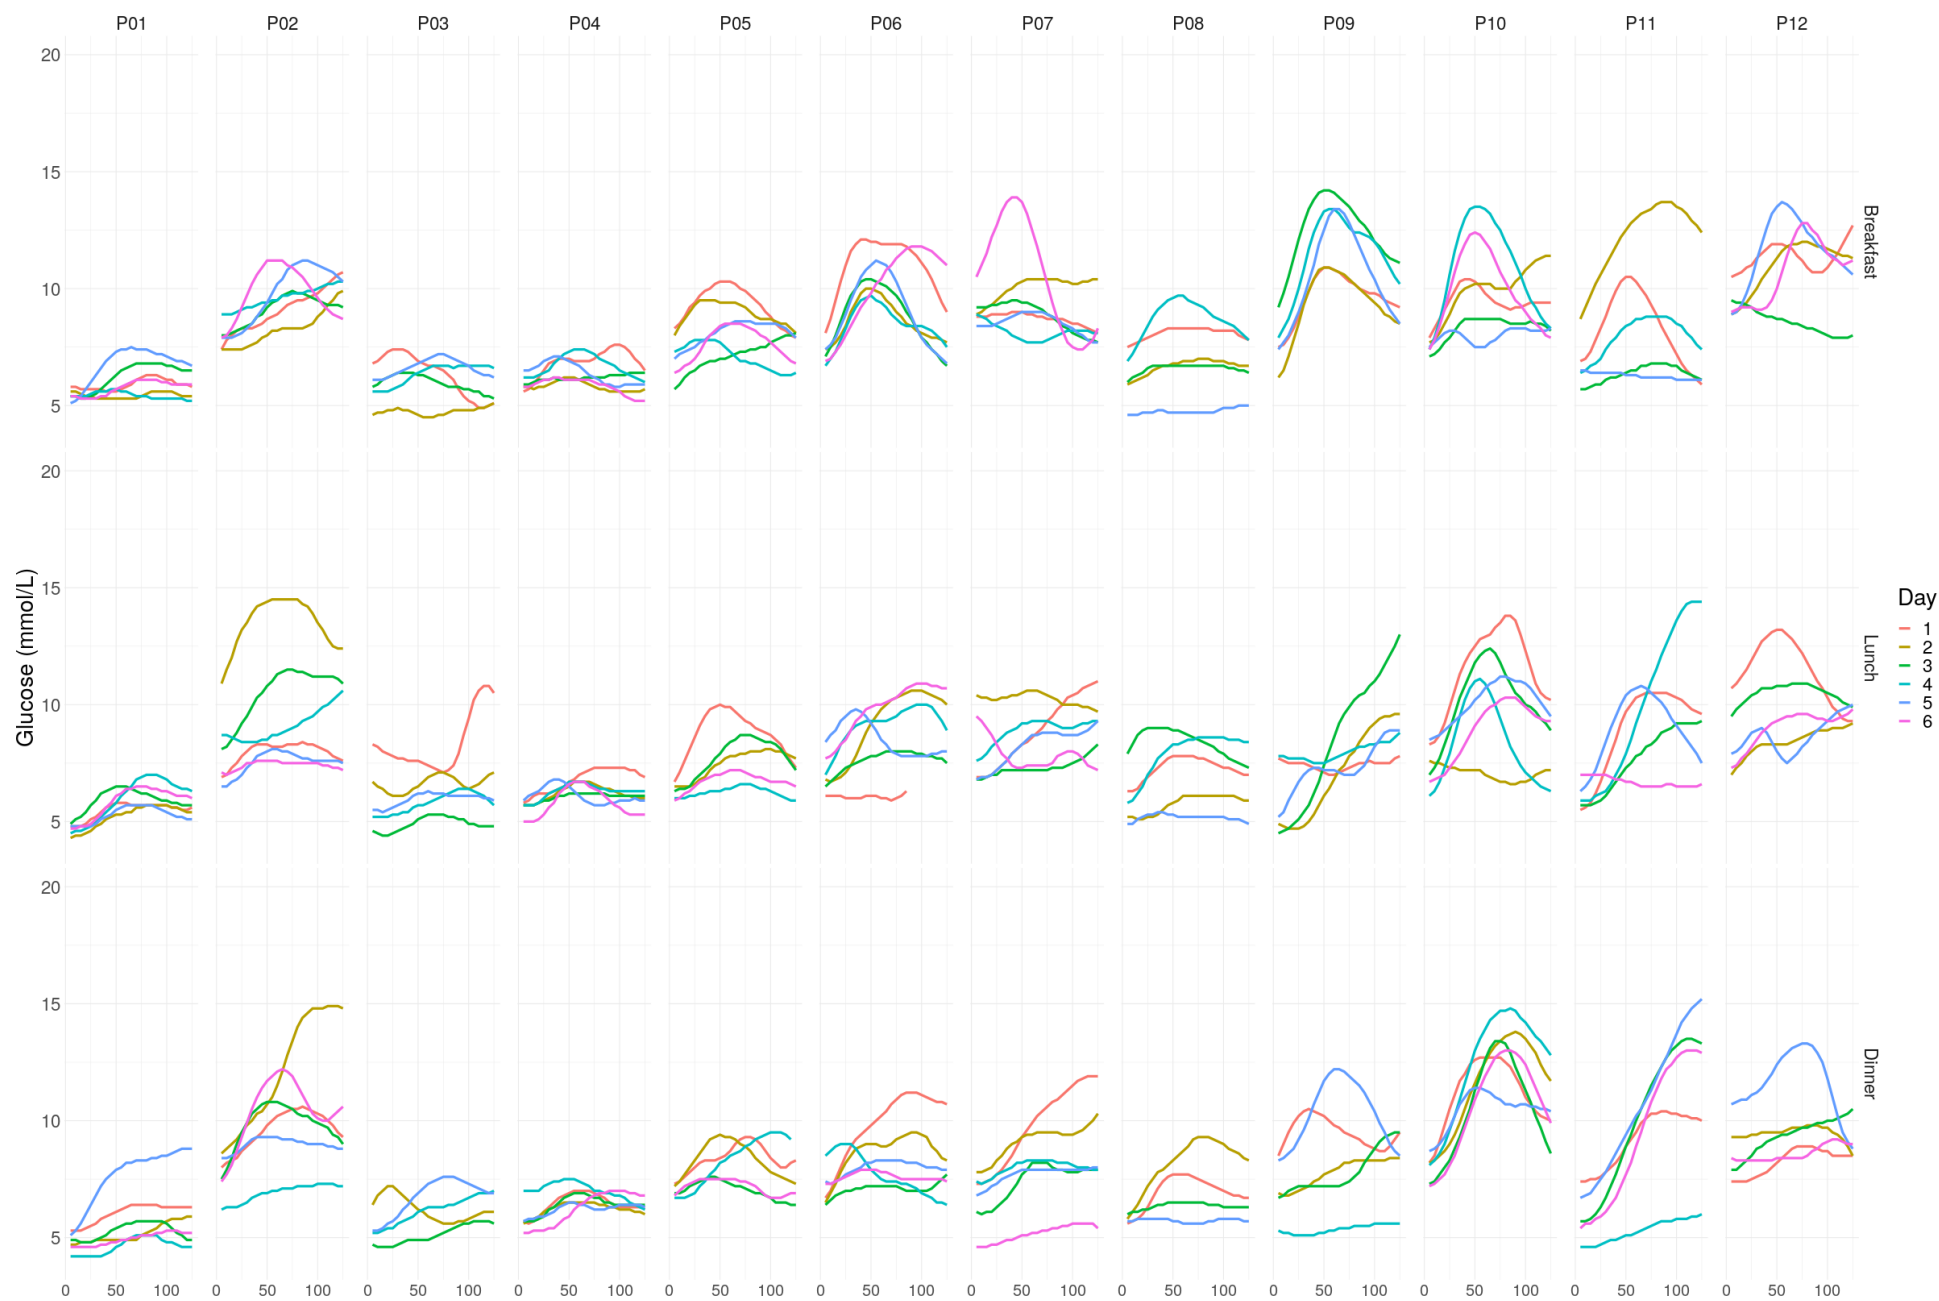

Supplementary data: Figure S2: Post-prandial glucose excursions for each participant per meal, per day.

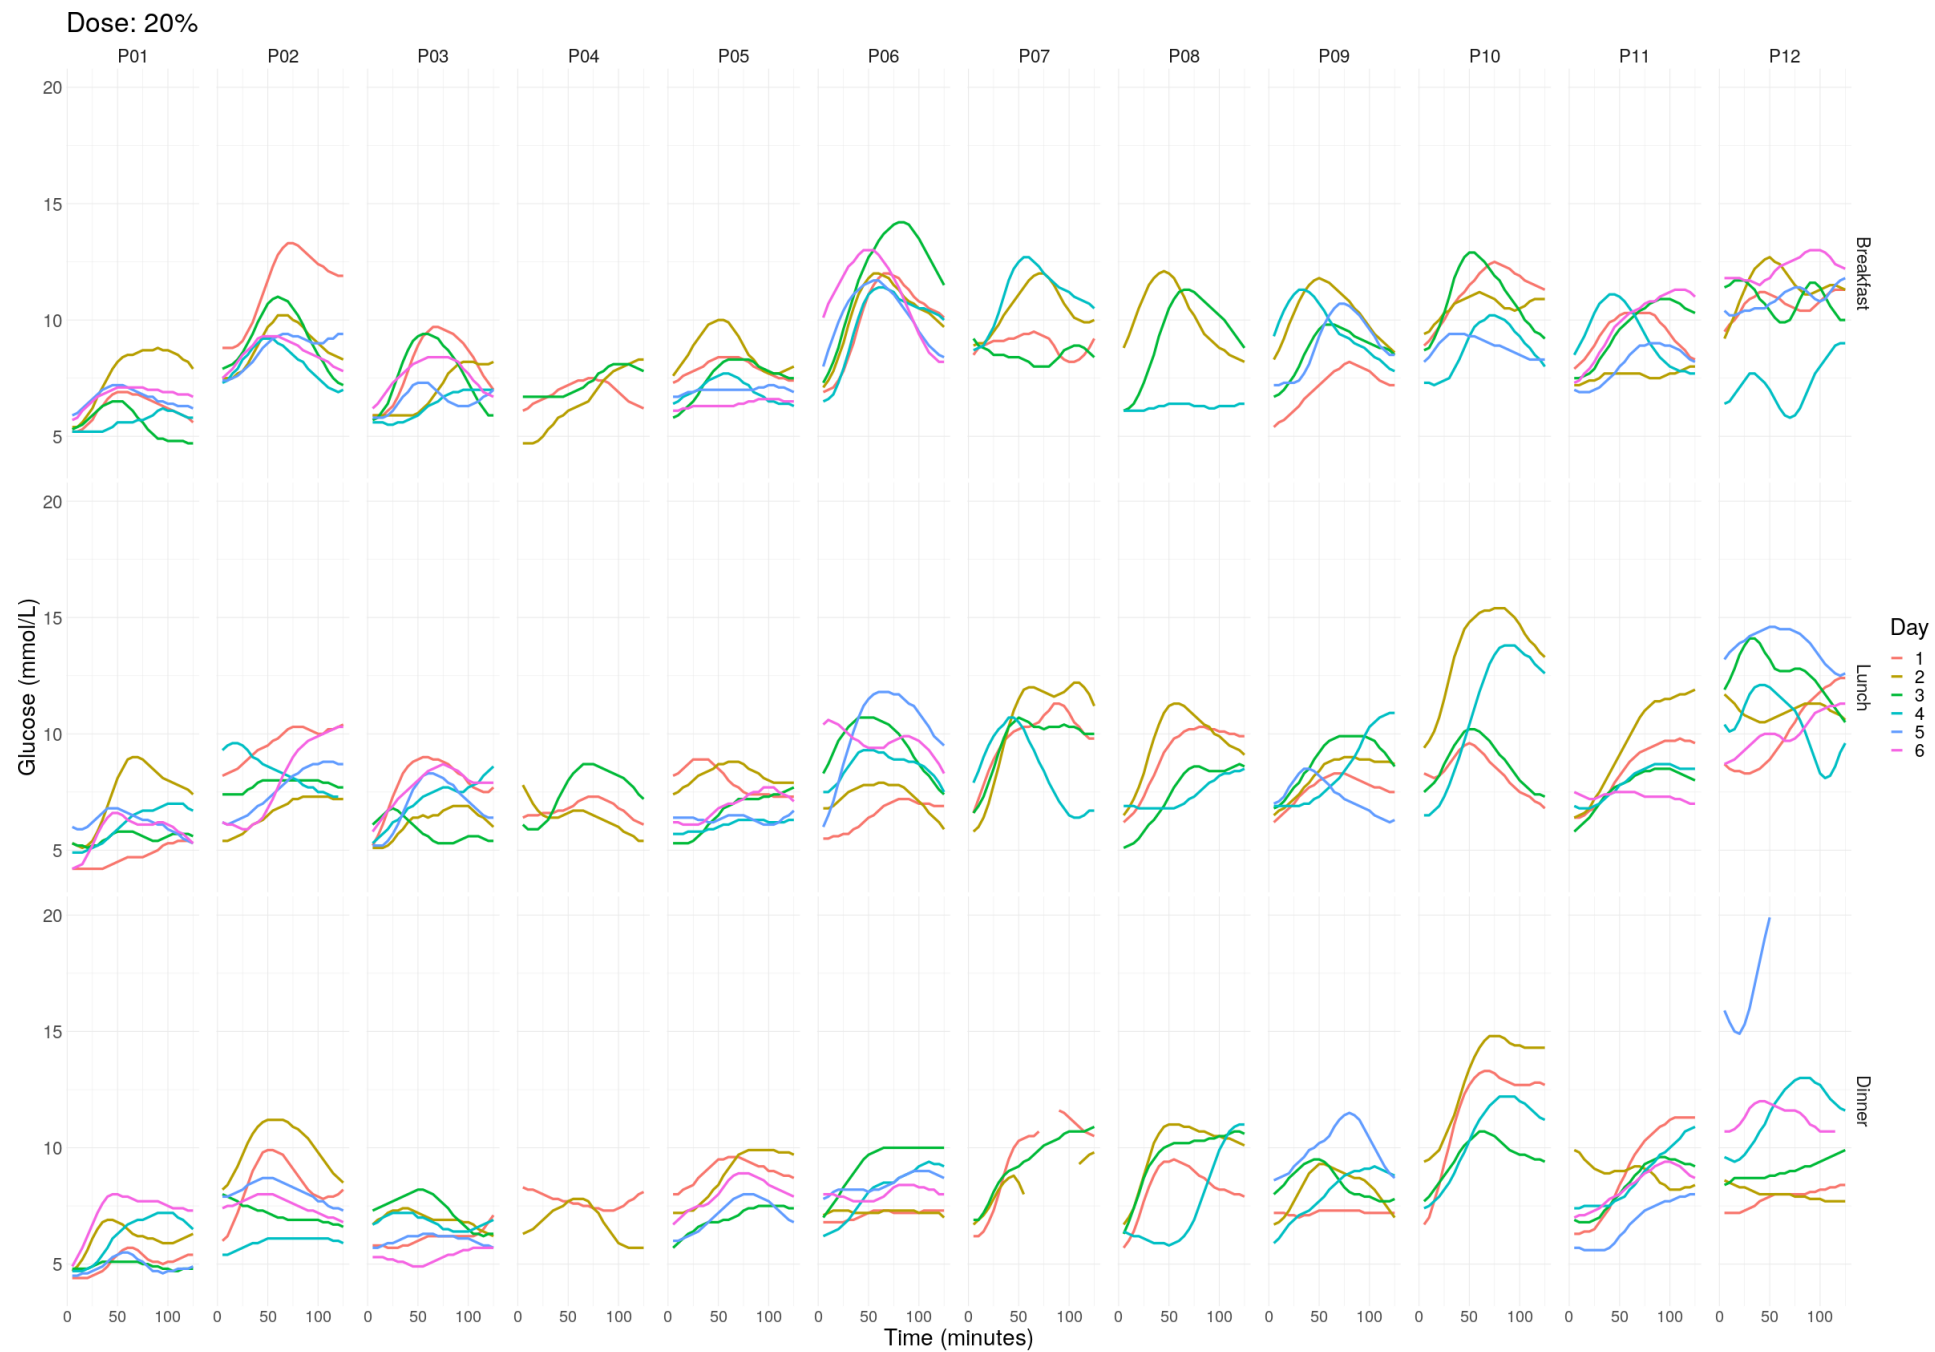

Supplementary data: Figure S2: Post-prandial glucose excursions for each participant per meal, per day.

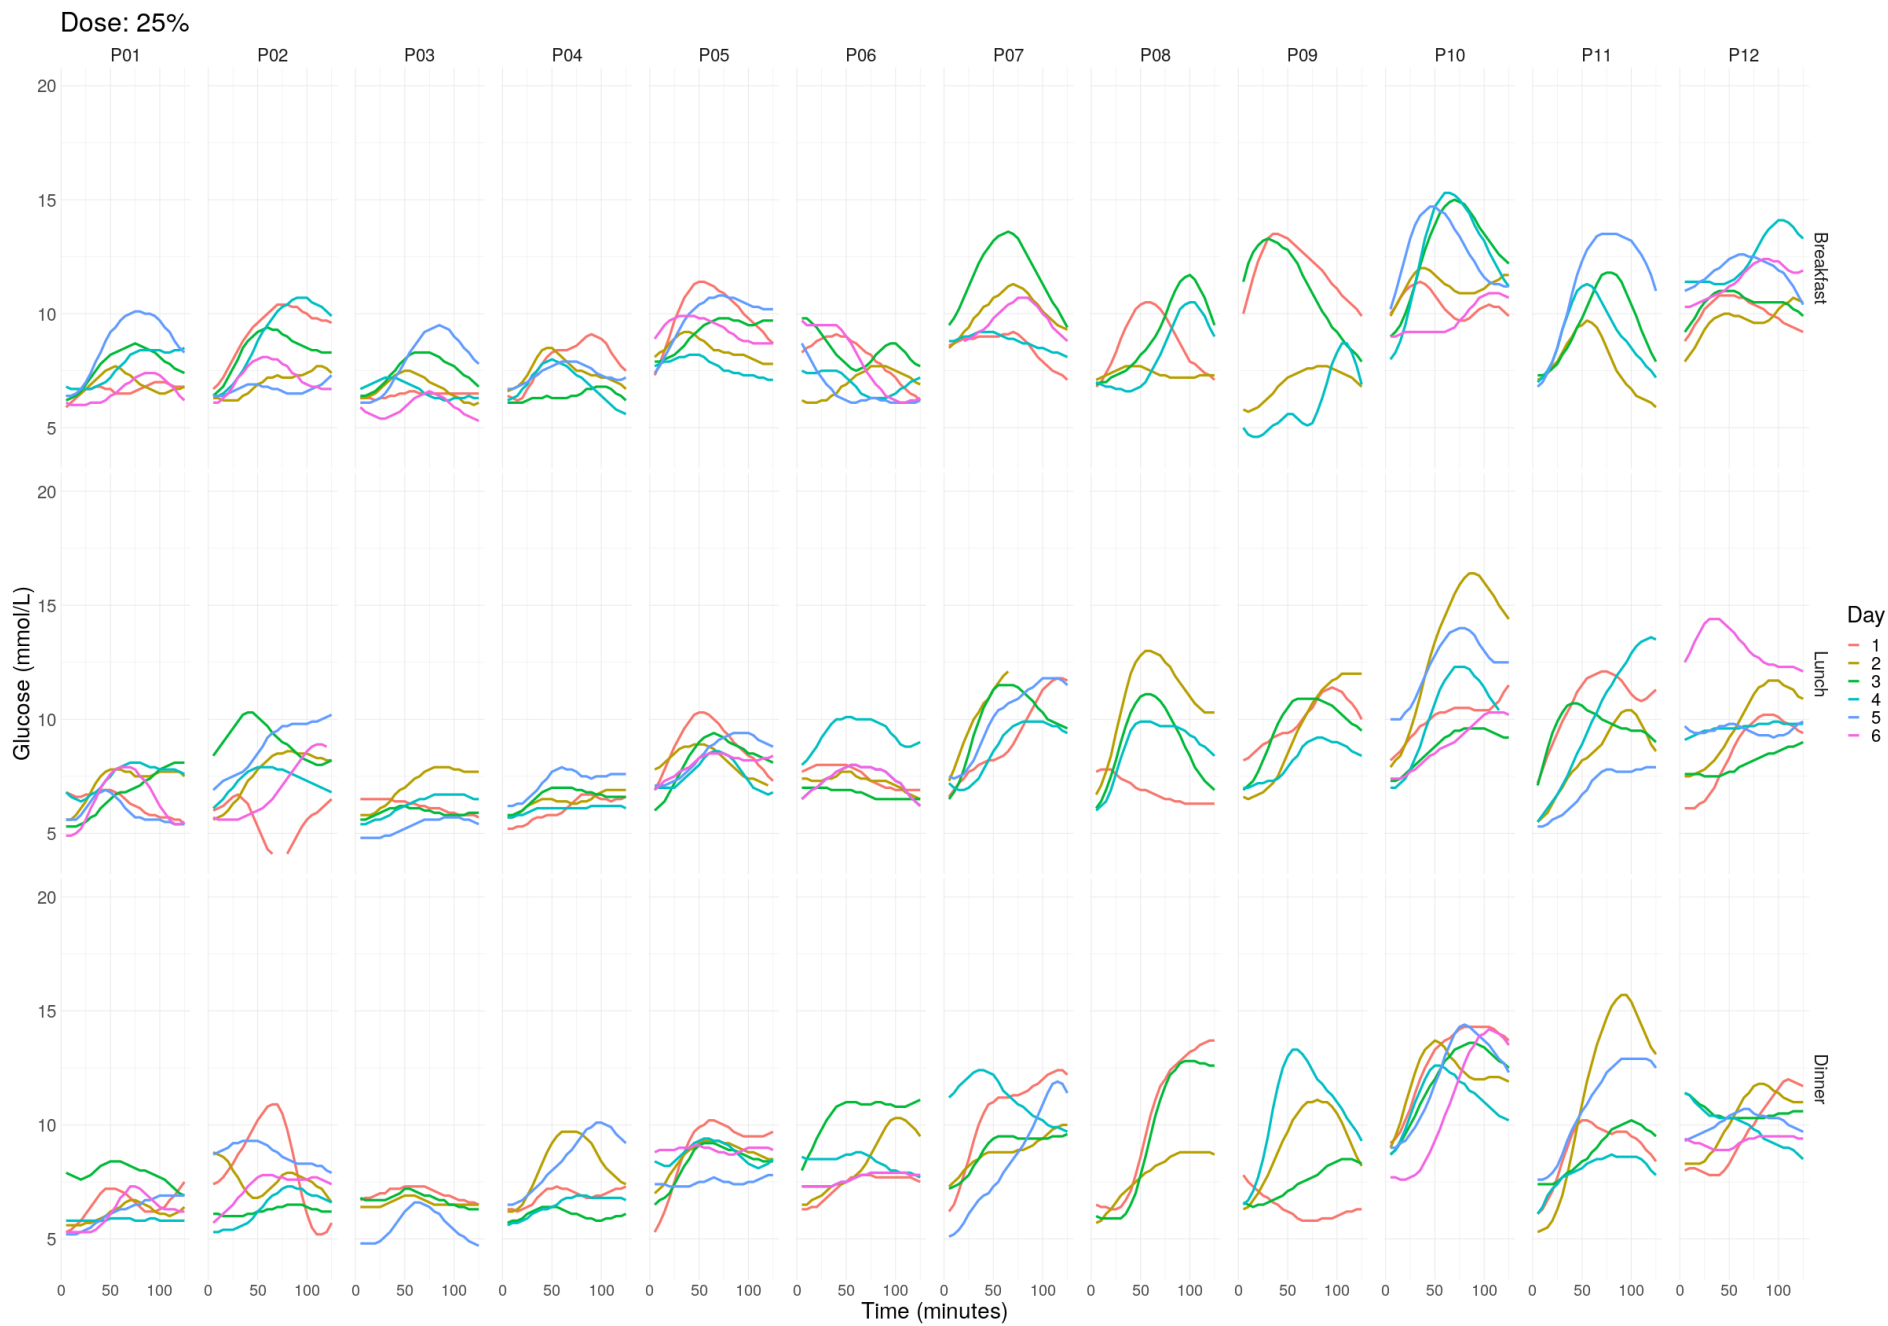

Supplementary data: Figure S2: Post-prandial glucose excursions for each participant per meal, per day.

Dose: 30%

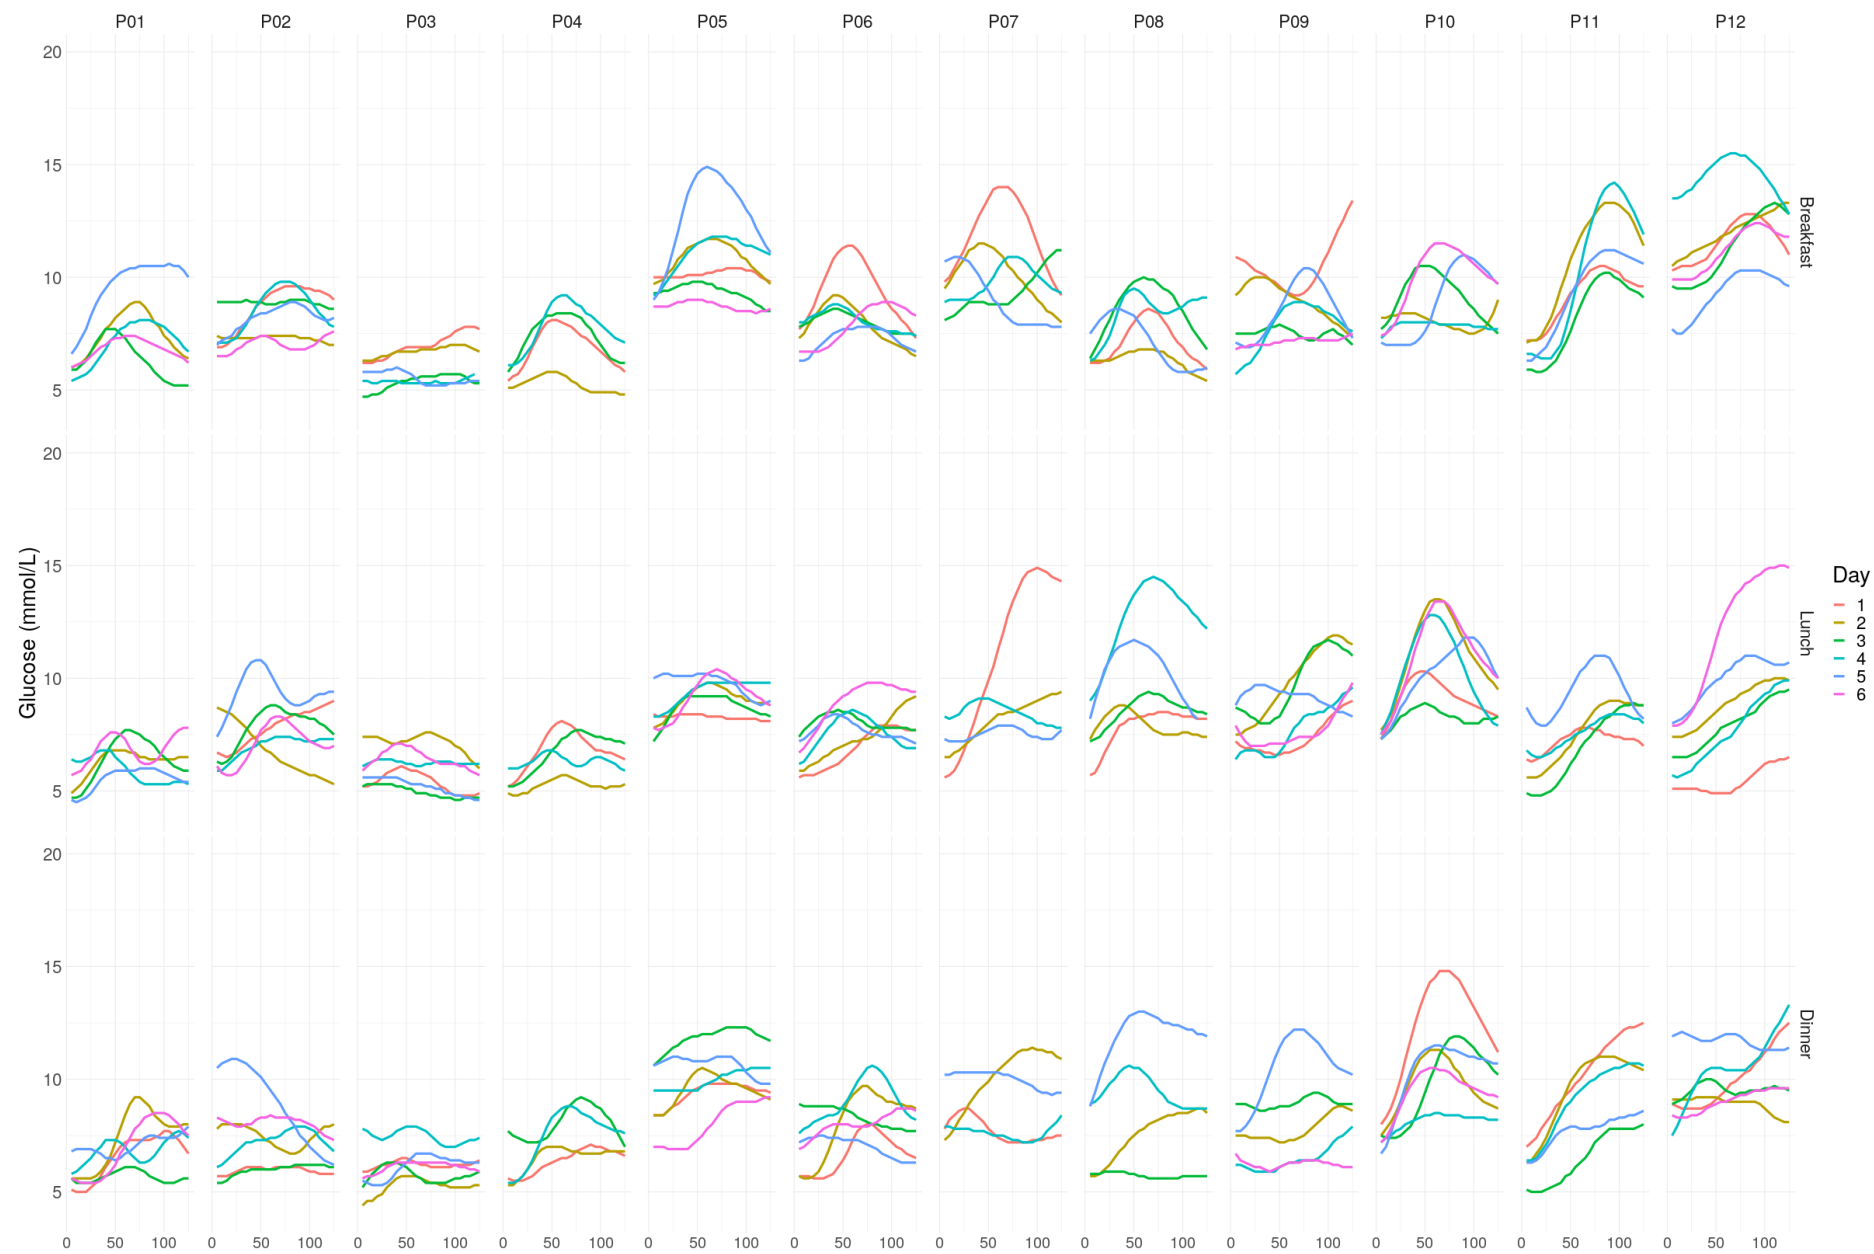

Supplement: Supplementary file [file media-1.pdf]
